# Supplementary figures and images for: Vachellia farnesiana Pods or a Polyphenolic Extract Derived from Them Exert Immunomodulatory, Metabolic, Renoprotective, and Prebiotic Effects in Mice Fed a High-Fat Diet
Source: MDPI journal article supplement (doi:10.3390/ijms24097984), 2023-04-28

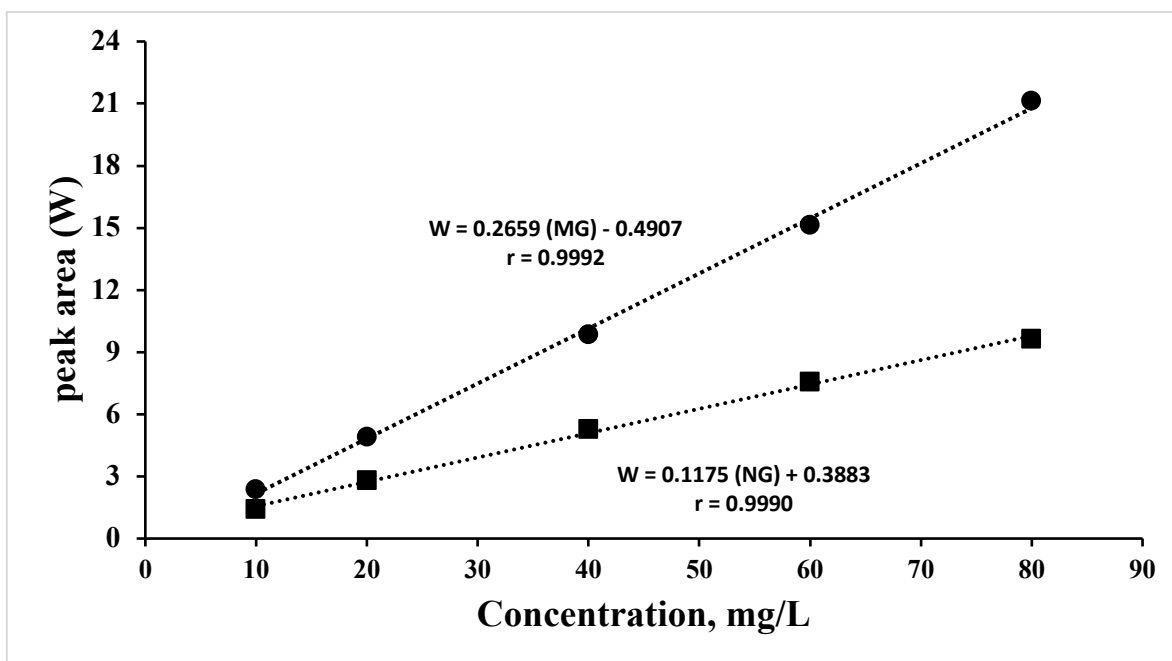

Figure S1. Calibration curve of methyl gallate (MG) ● and naringenin (NA) ■

Supplement: s1 [file s1]
